# Supplementary material
Source: Springer Nature journal article supplement (https://www.springermedizin.de/resource/supplementary/12985_2006_145_MOESM5_ESM.pdf/9607380)
Supplement: MOESM5 [file 9607380]

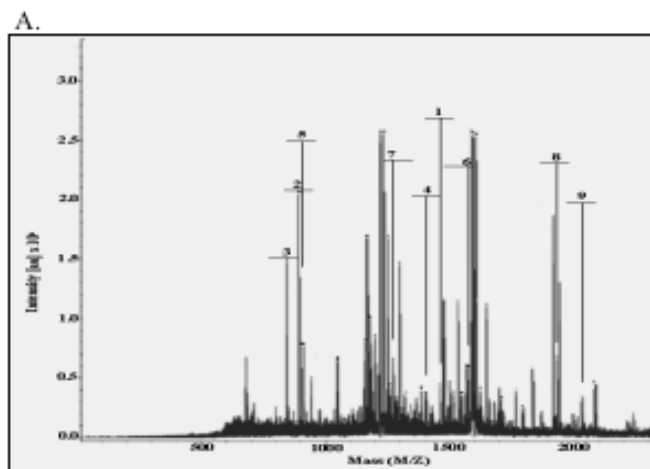

B.

| Peptide number | Experimental mass | Predicted mass | Position of peptide | MC* | Peptide sequence    |
|----------------|-------------------|----------------|---------------------|-----|---------------------|
| 1              | 1458.74           | 1459.7362      | 70-80               | 0   | VIHNELELYCR         |
| 2              | 894.3085          | 894.4468       | 118 - 124           | 0   | WYTAPTR             |
| 3              | 844.2945          | 844.4206       | 125-132             | 1   | GPAANCRR            |
| 4              | 1402.479          | 1401.7597      | 205-216             | 1   | TASYLLIHDGRR        |
| 5              | 892.2887          | 891.5047       | 238 - 244           | 1   | SWIRTTK             |
| 6              | 1566.675          | 1565.8645      | 242-255             | 1   | TTKVTGDHPLVIER      |
| 7              | 1235.465          | 1235.6742      | 245-255             | 0   | VTGDHPLVIER         |
| 8              | 1940.871          | 1940.9422      | 291 - 309           | 0   | SIFGPGGTPSLFPTSCSTK |
| 9              | 2031.072          | 2032.9289      | 323 - 339           | 0   | LMLFGATLDDQAFCCSR   |

\* Number of modifications
